# Supplementary material for: Bioactive Phytochemicals: Efficient Synthesis of Optically Active Substituted Flav-3-enes and Flav-3-en-3-o-R Derivatives
Source: Hindawi journal article supplement (doi:10.1155/2017/3971253), 2017-01-01

## Supplementary Material

### **Bioactive Phytochemicals: Efficient Synthesis of Optically Active Substituted Flav-3- enes and Flav-3-en-3-*O*-derivatives**

**Matthew Chilaka Achilonu,<sup>1,2</sup> Moosa Mahmood Sedibe,<sup>2</sup> and Karabo Shale<sup>1</sup>**

<sup>1</sup>Faculty of Natural Sciences, Mangosuthu University of Technology, Umlazi, Durban, KwaZulu Natal, South Africa

<sup>2</sup>Department of Agriculture, Faculty of Health and Environmental Sciences, Central University of Technology, Free State, 1 Park Road, Bloemfontein 9301, South Africa

Author to whom correspondence should be addressed; E-Mail: [mcachilonu@yahoo.co.uk](mailto:mcachilonu@yahoo.co.uk); machilonu@cut.ac.za

# Representative $^1\text{H}$ and $^{13}\text{C}$ NMR Spectra of Substituted Flav-3-enes and Flav-3-O-derivatives

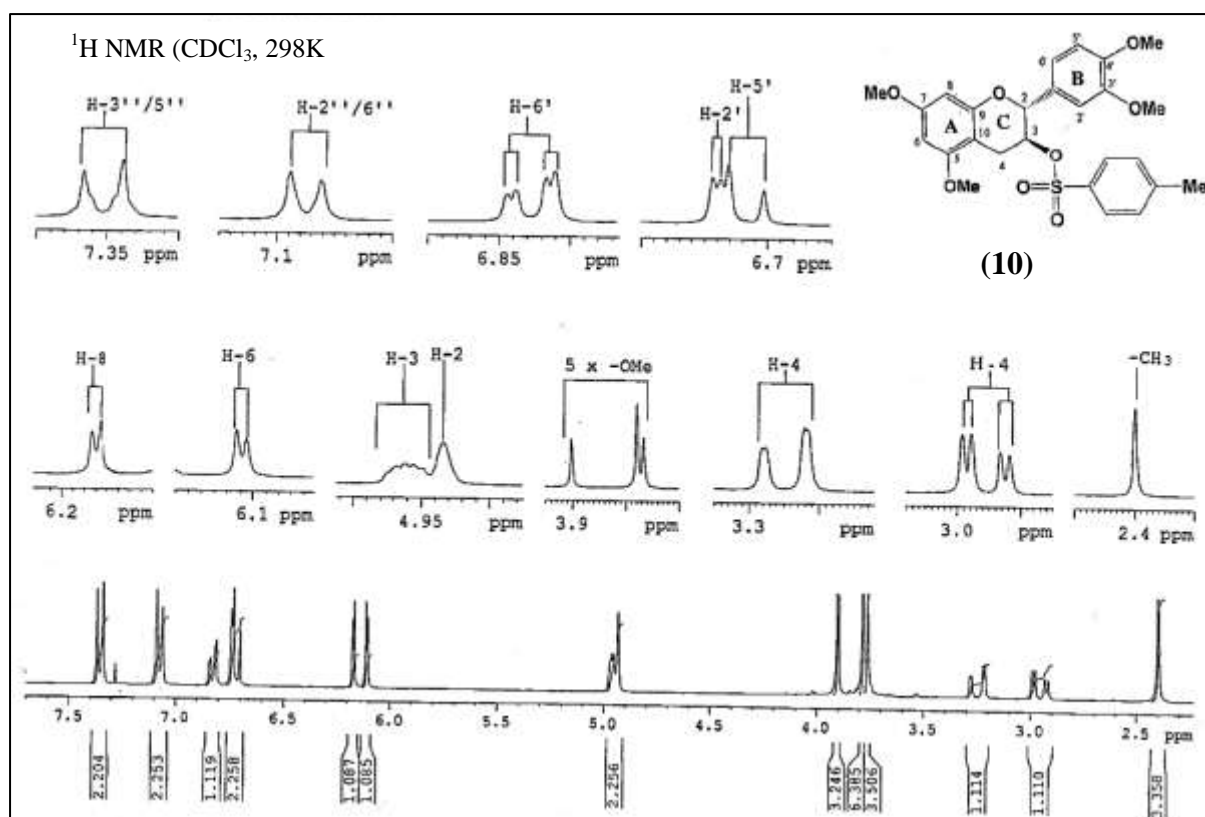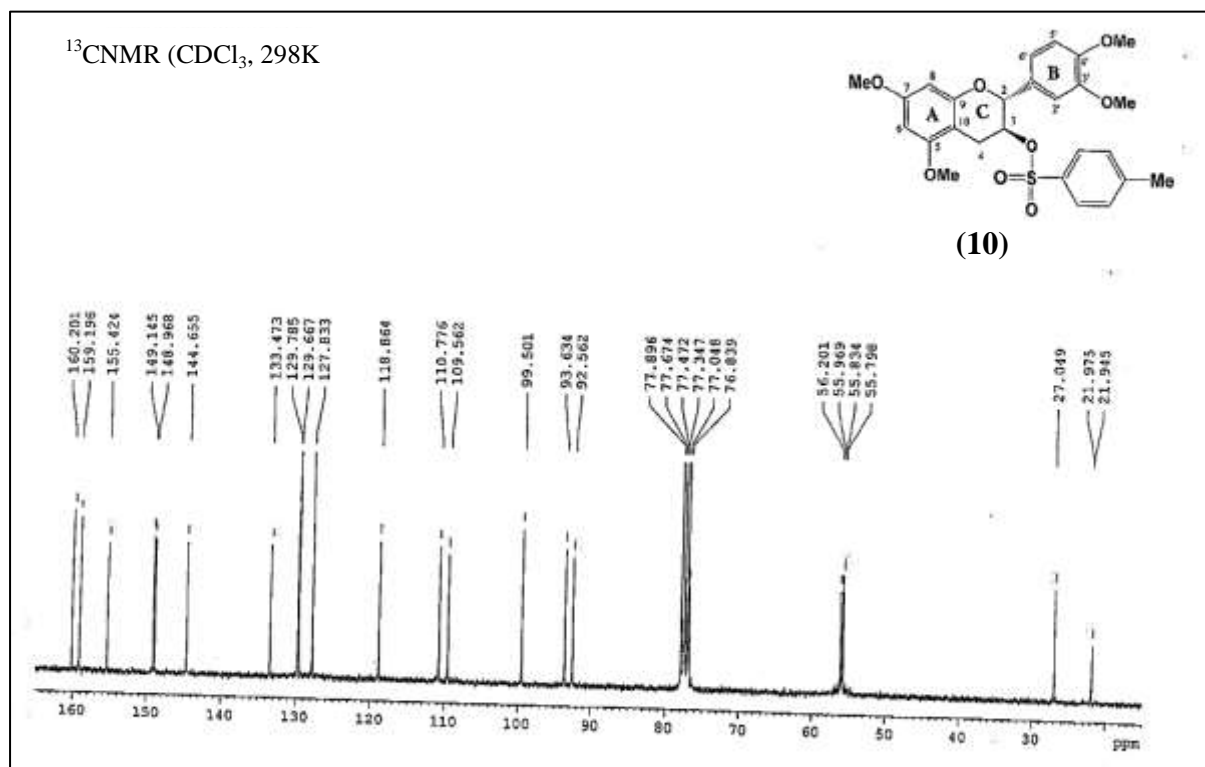



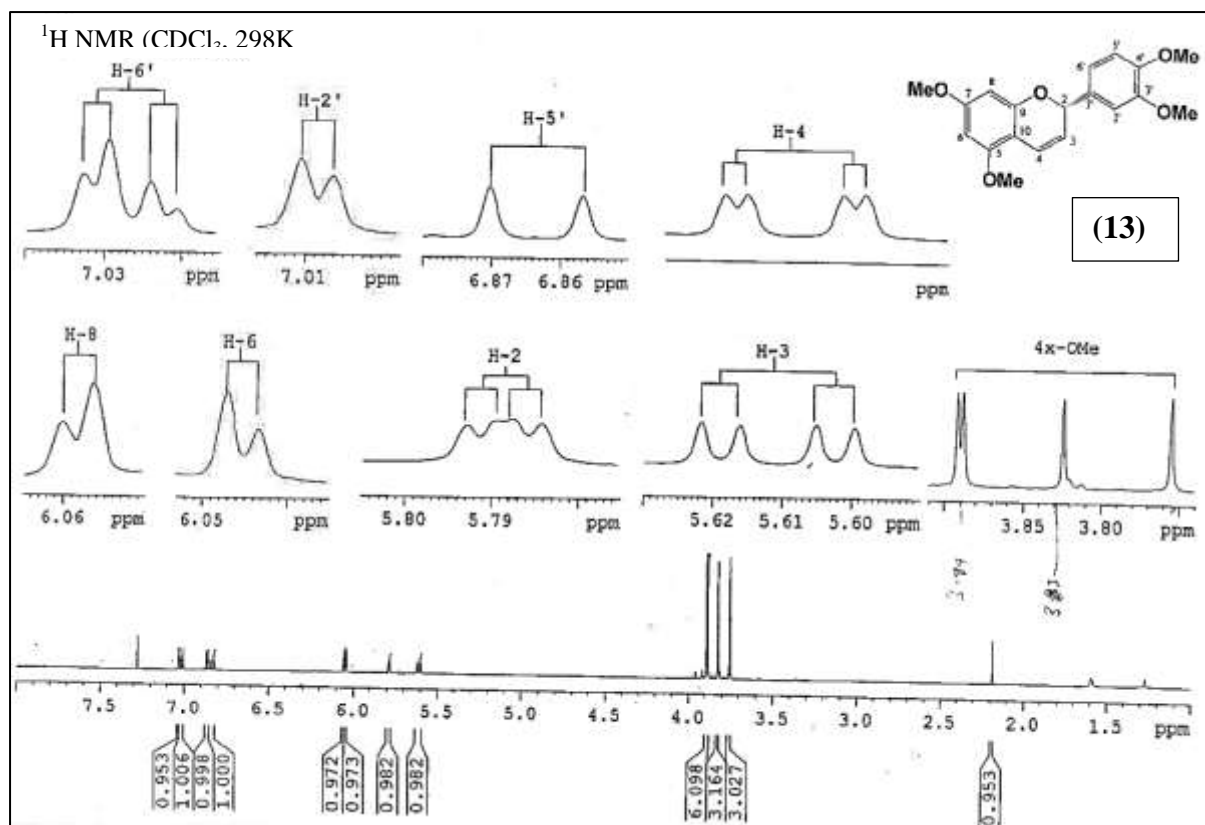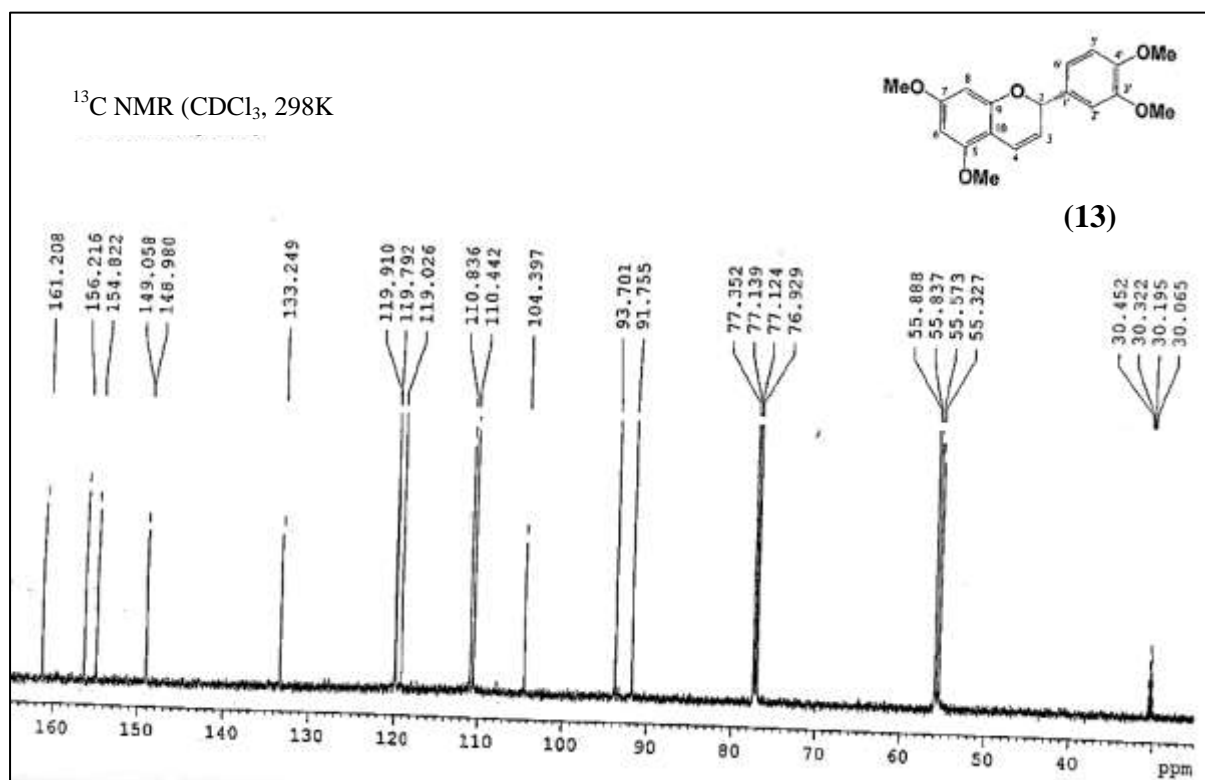

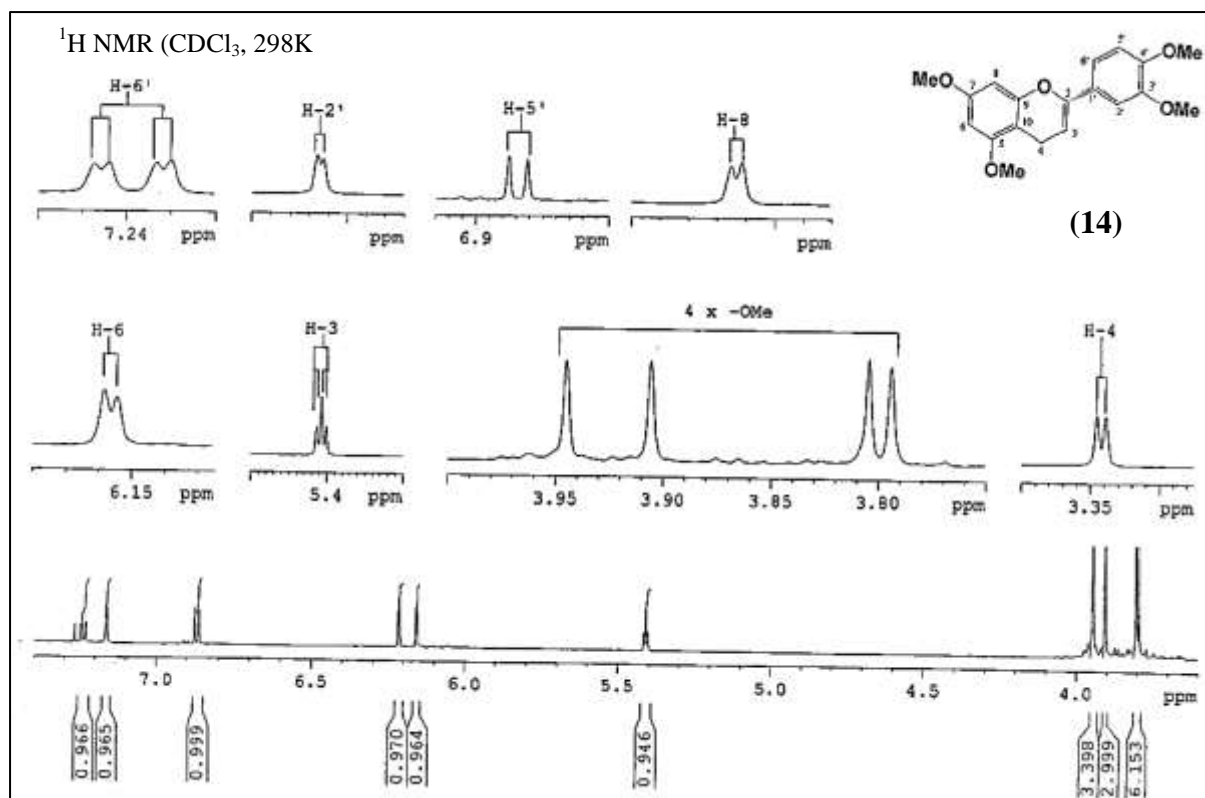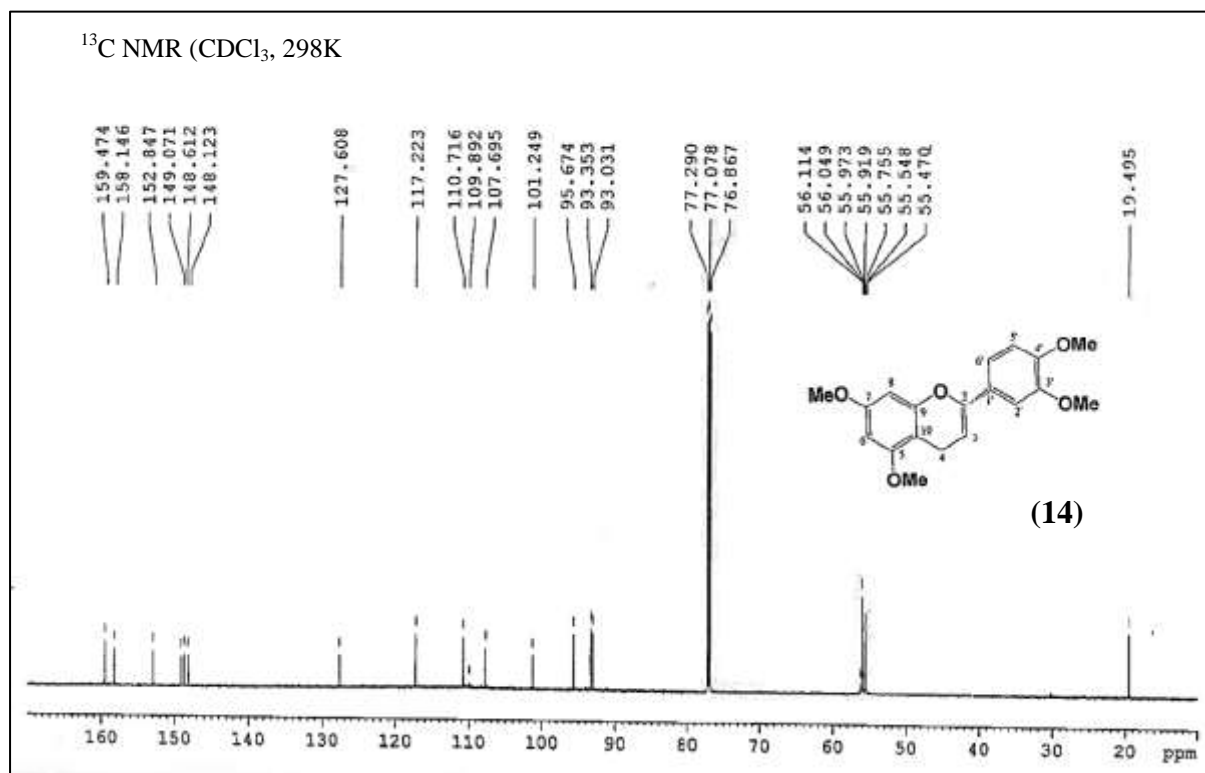

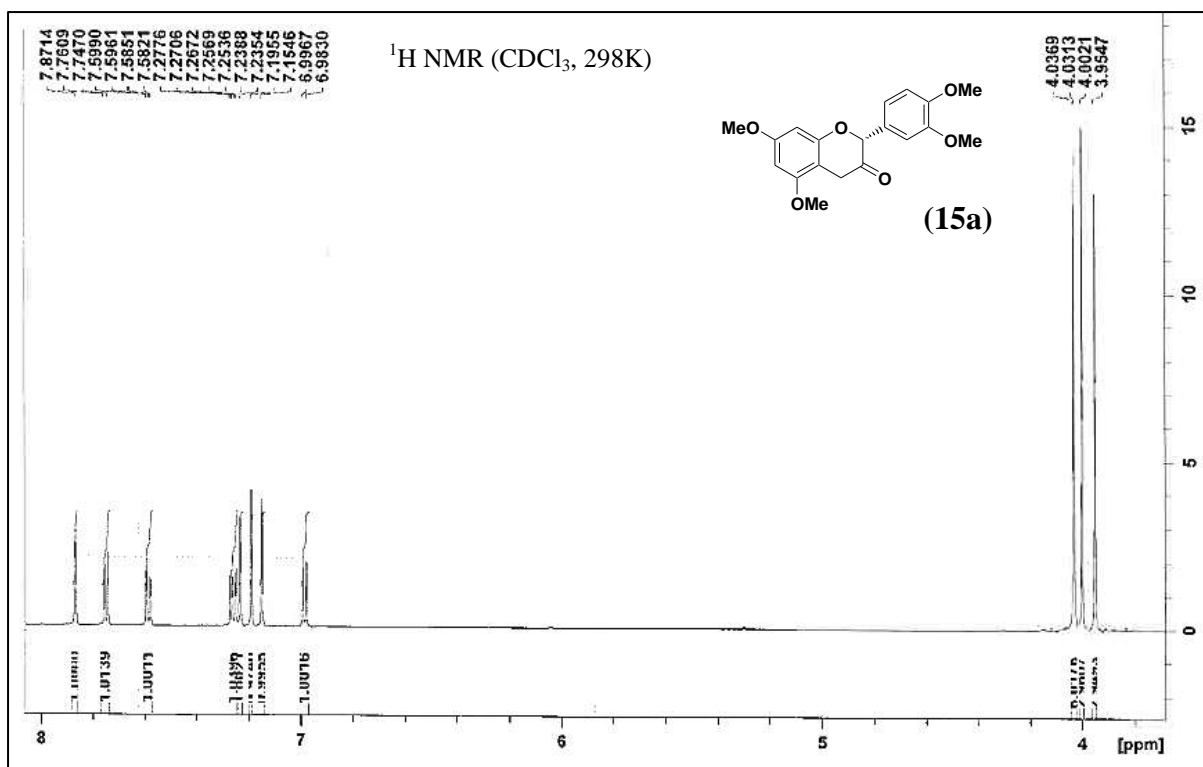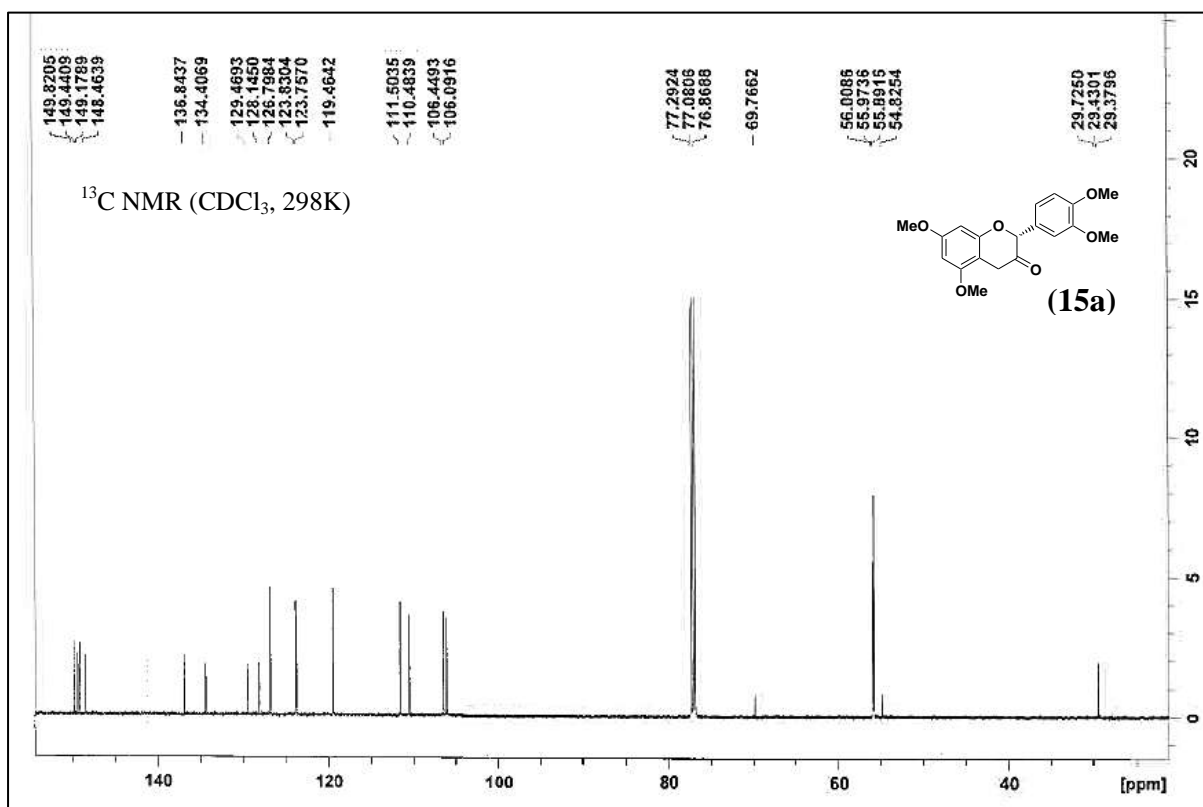

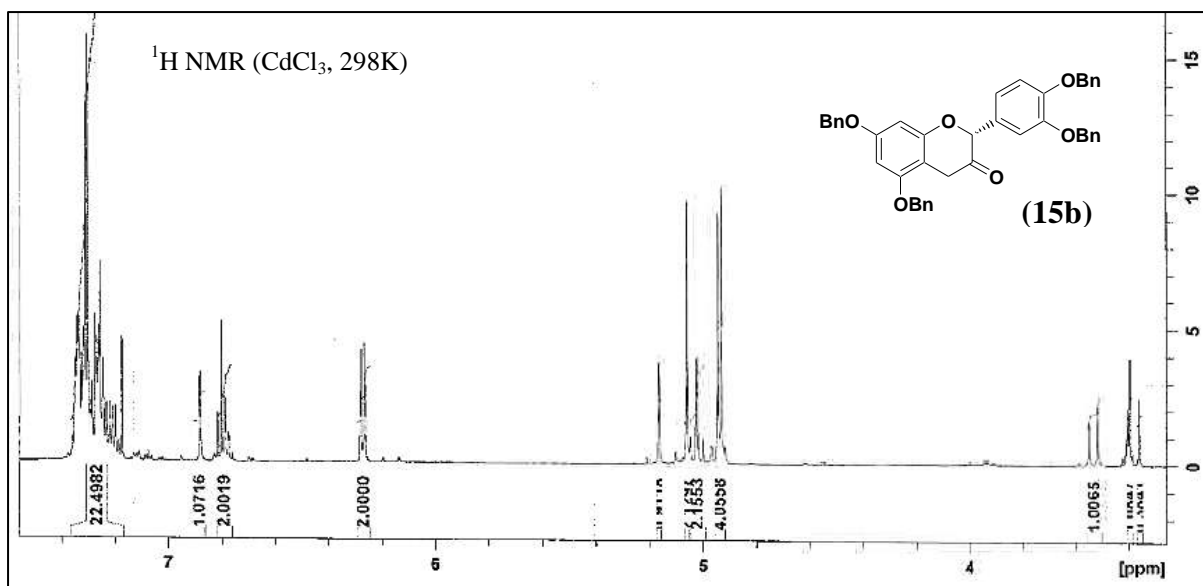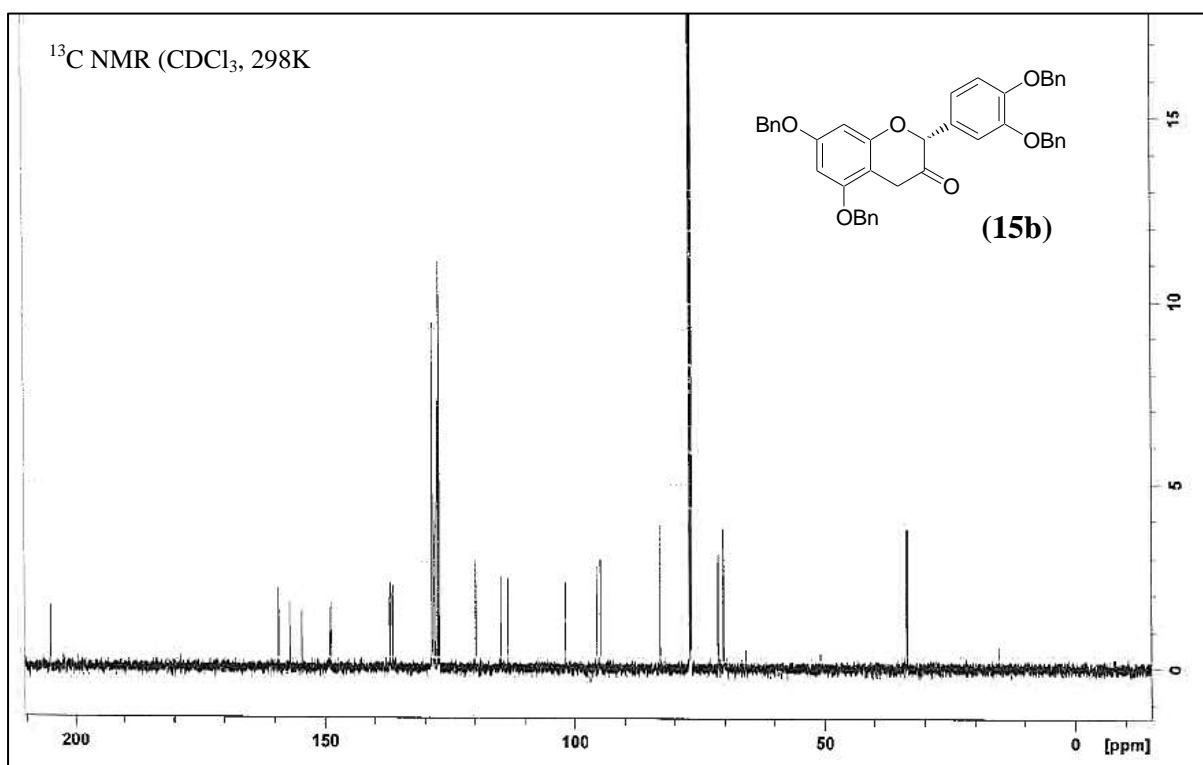

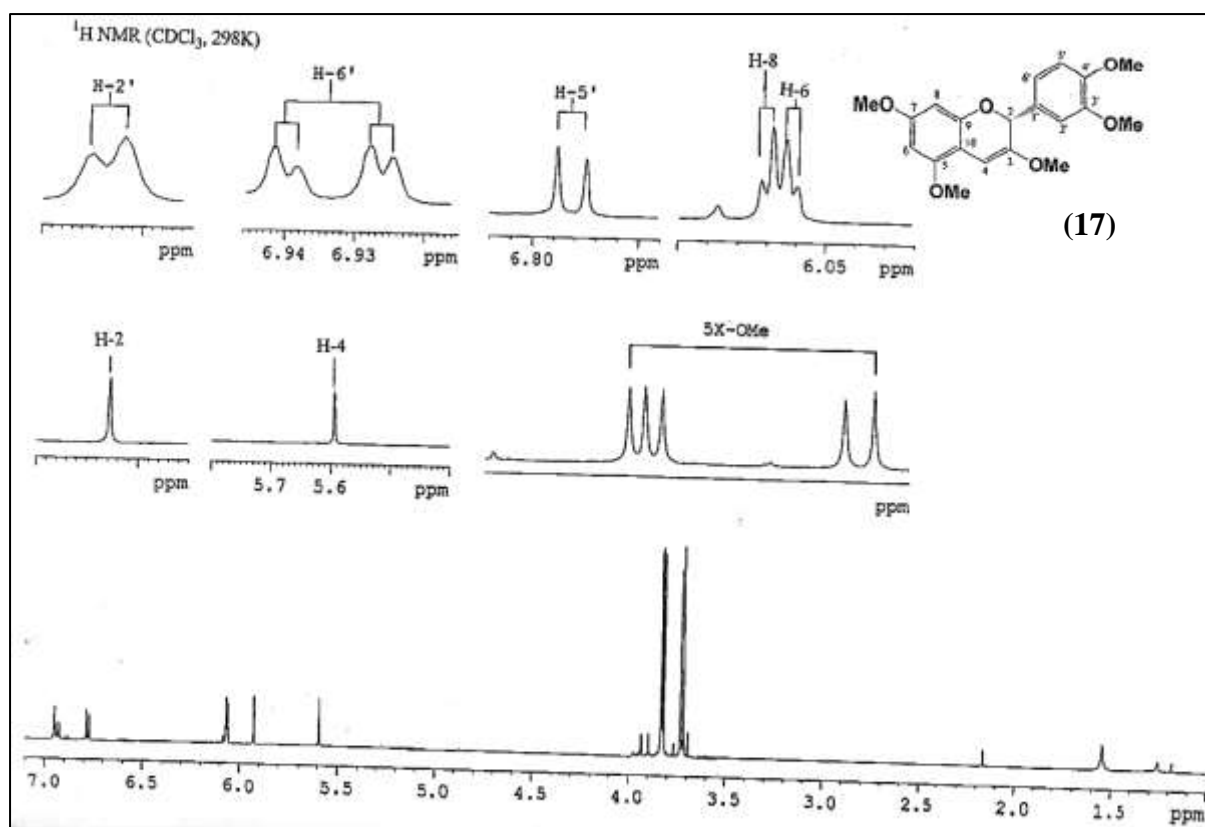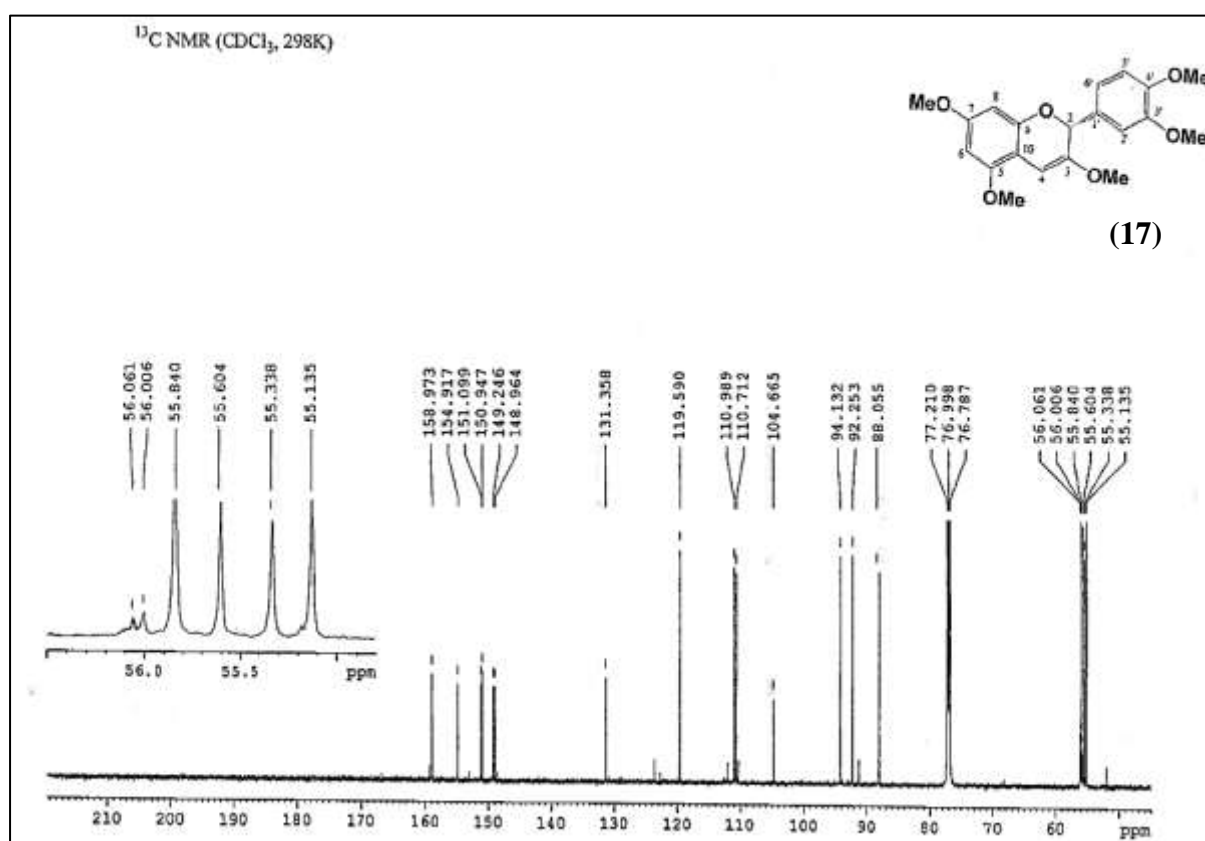



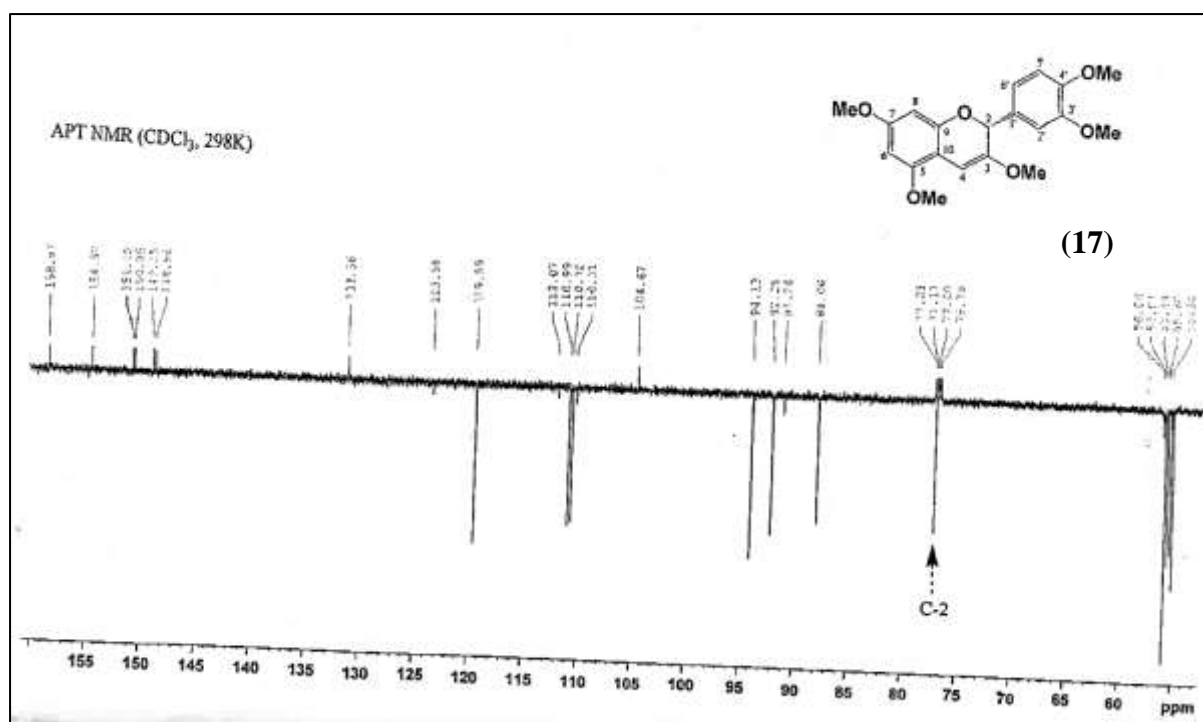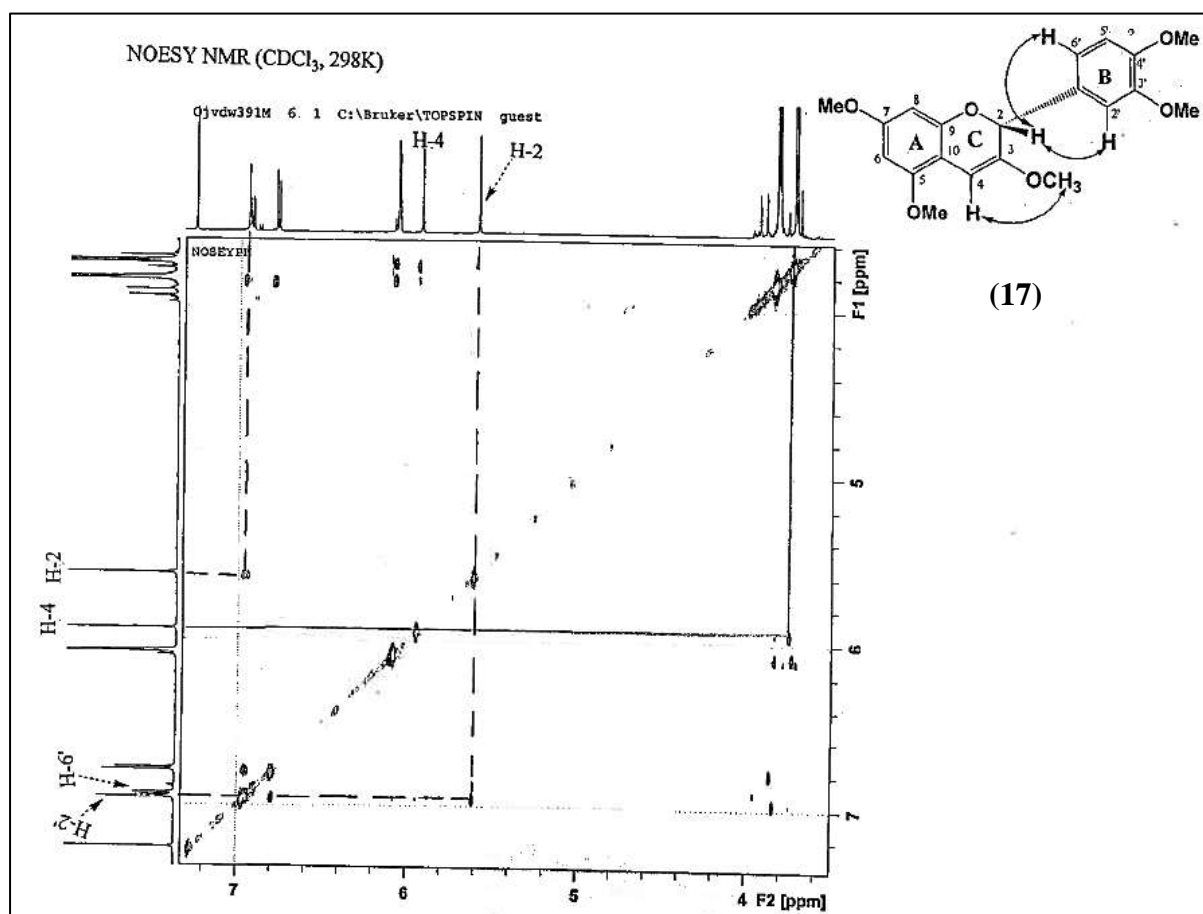

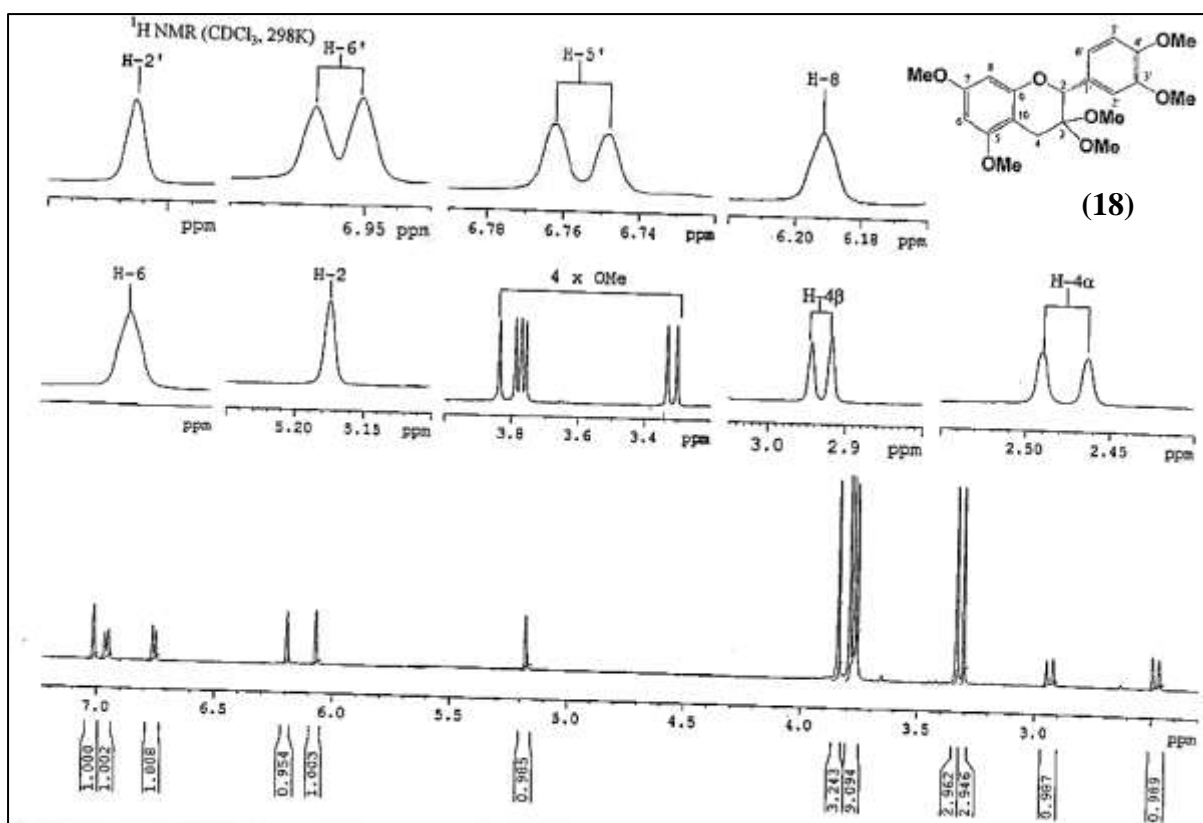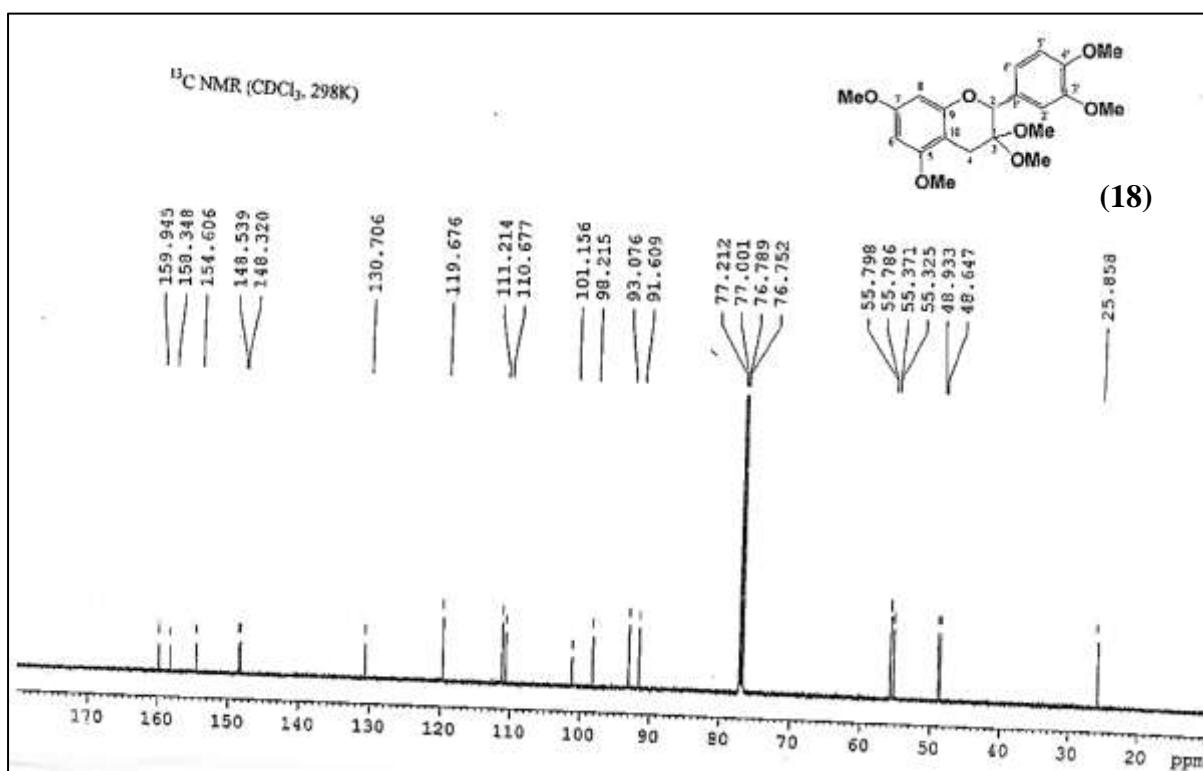

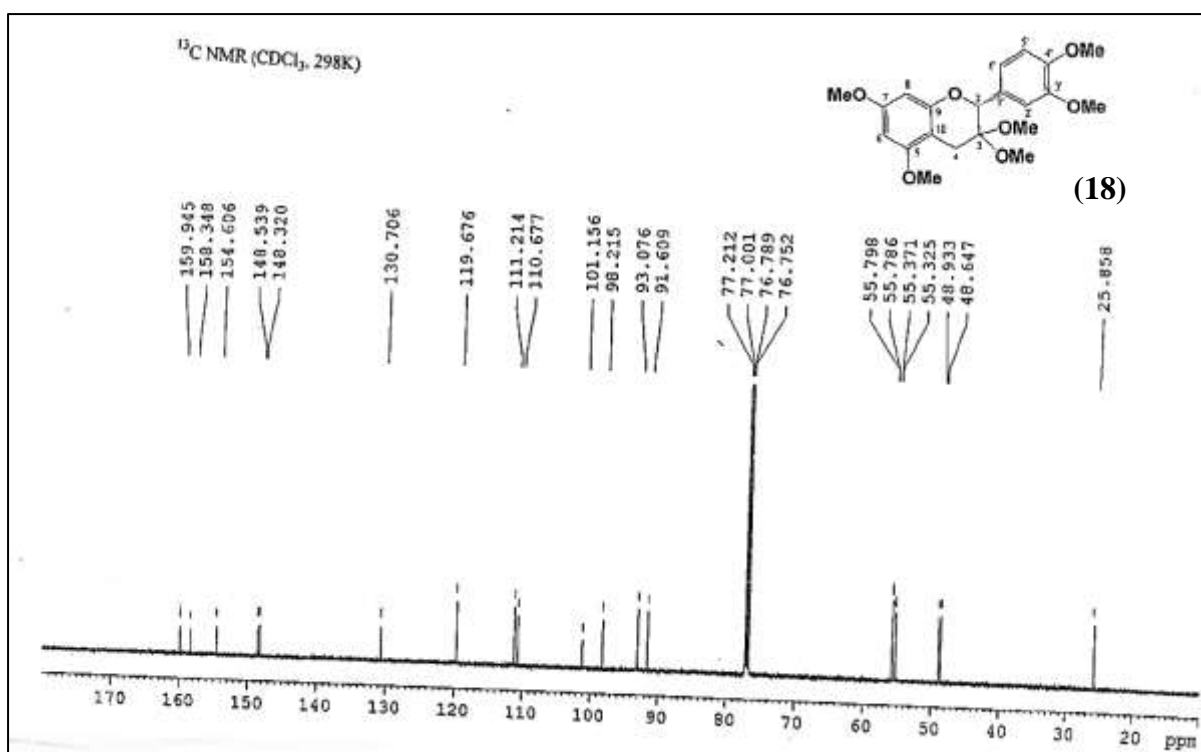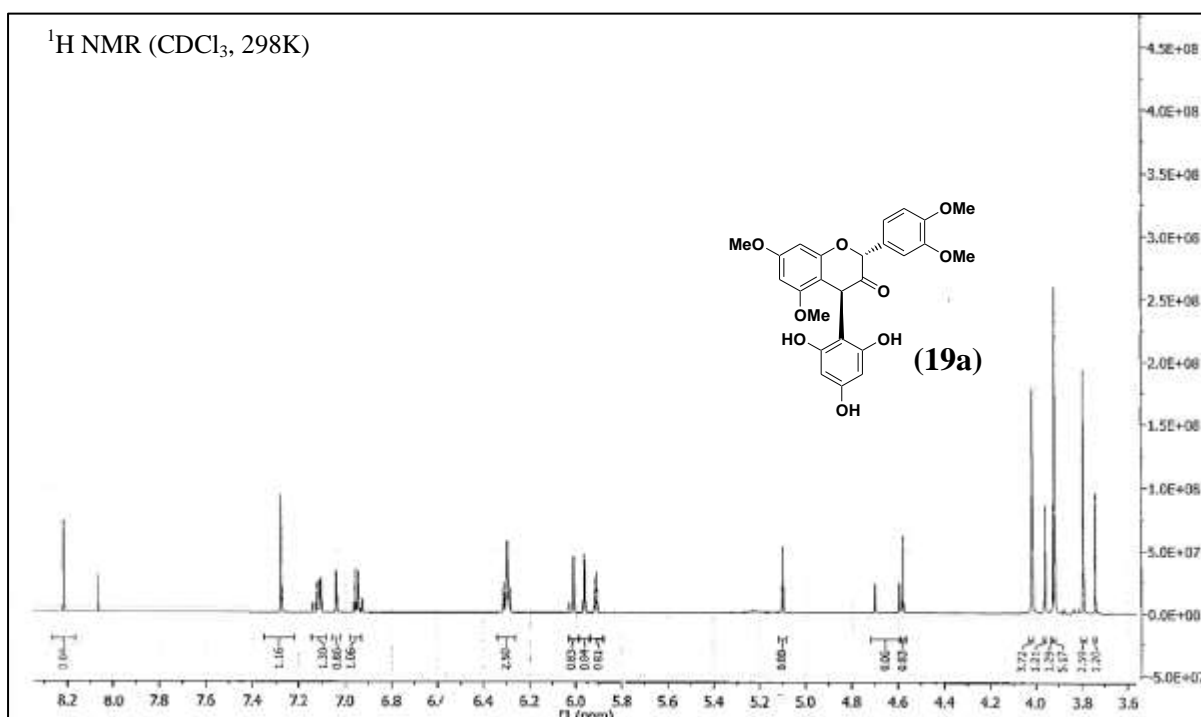

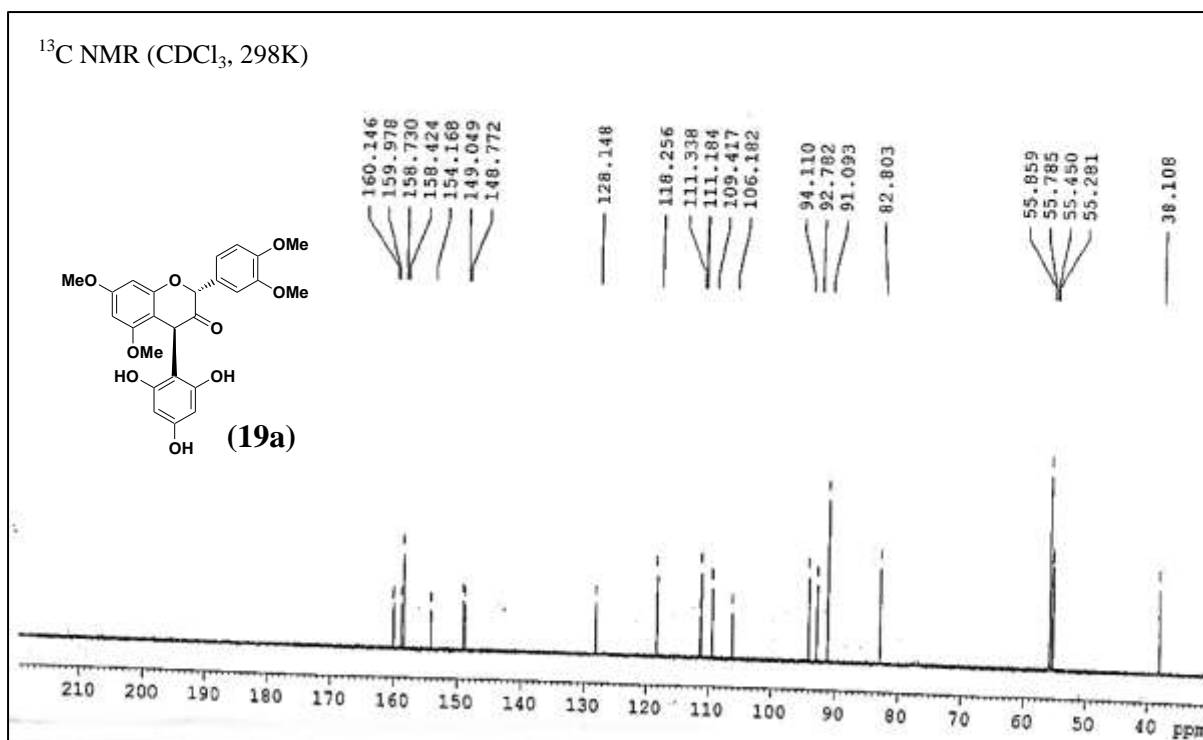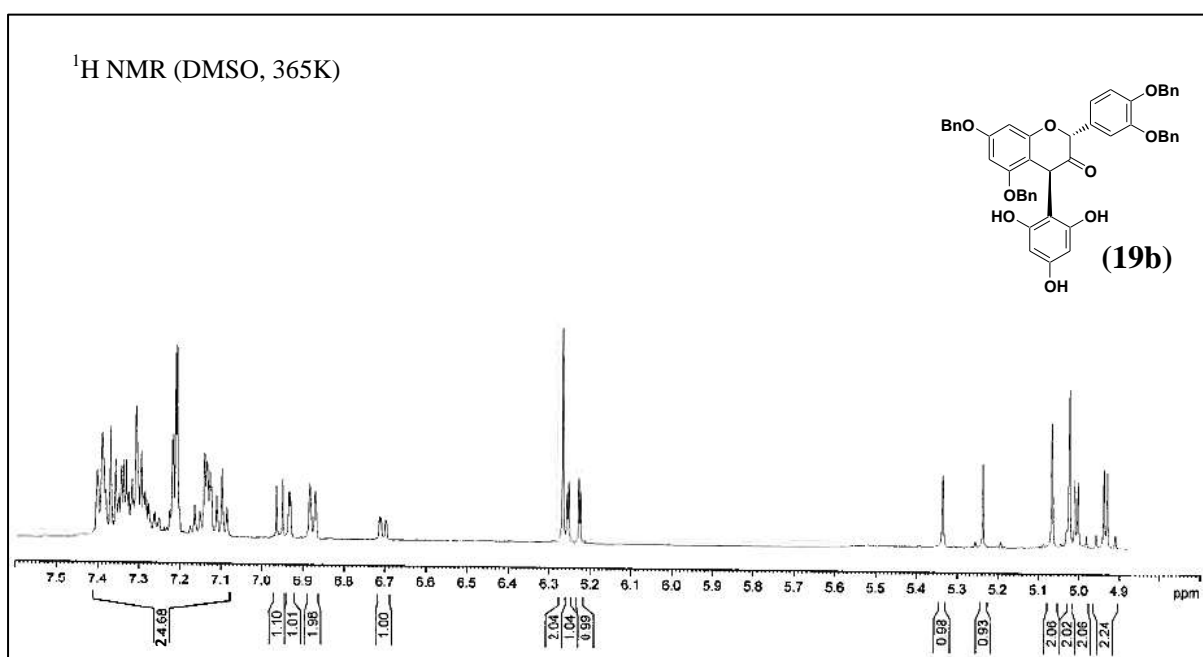

$^{13}\text{C}$  APT-NMR (DMSO, 365K)

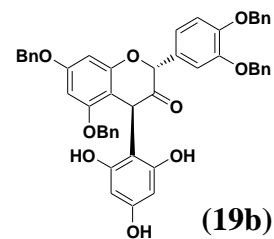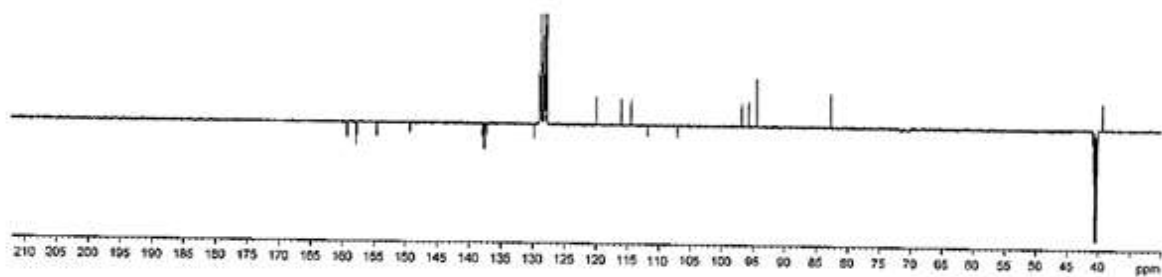

$^1\text{H}$  NMR (acetone, 298K)

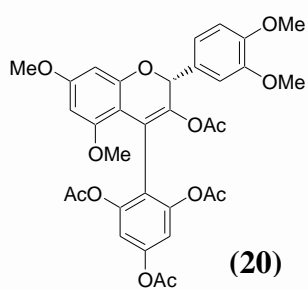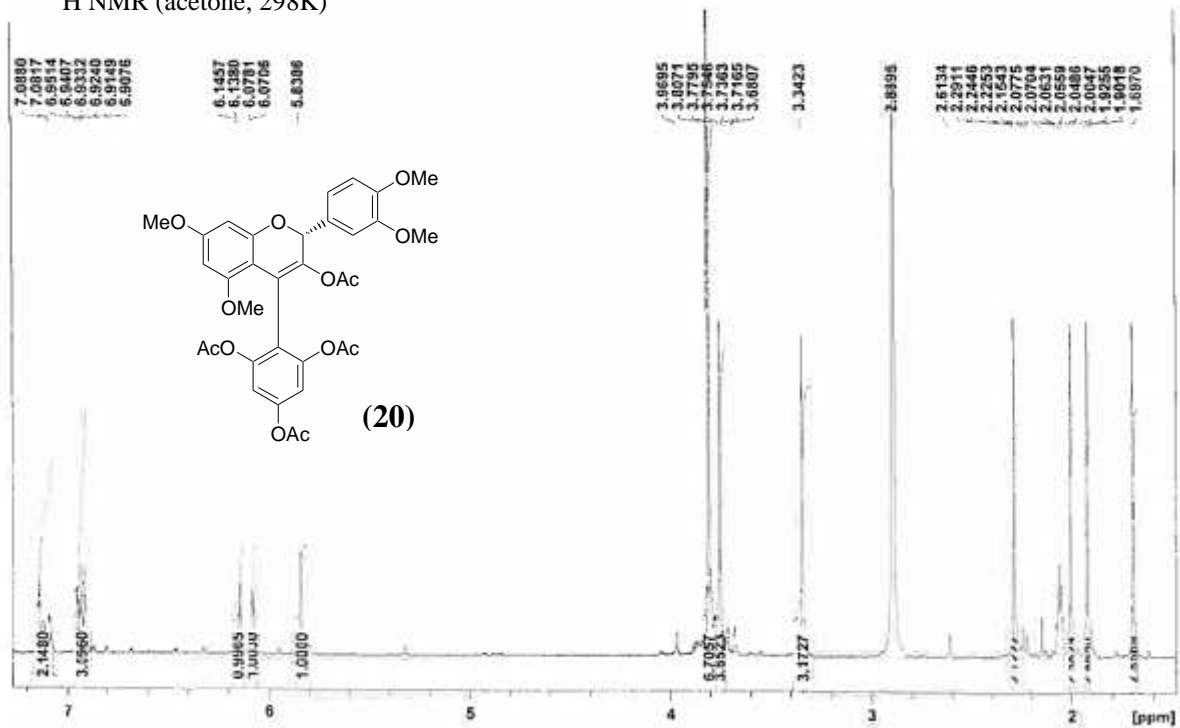

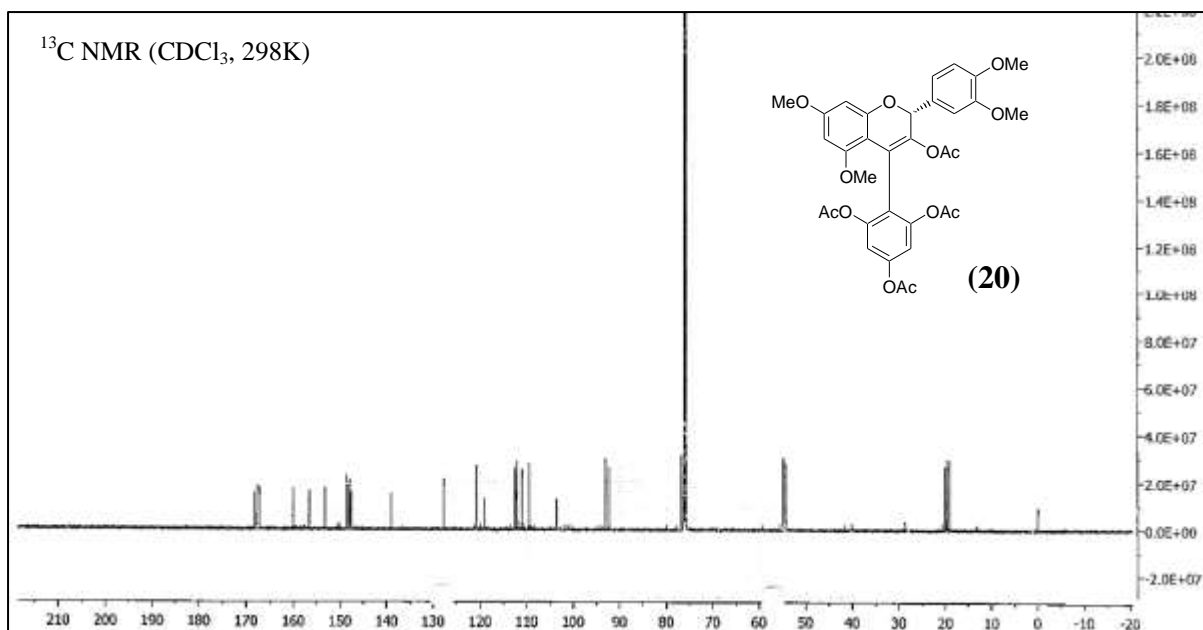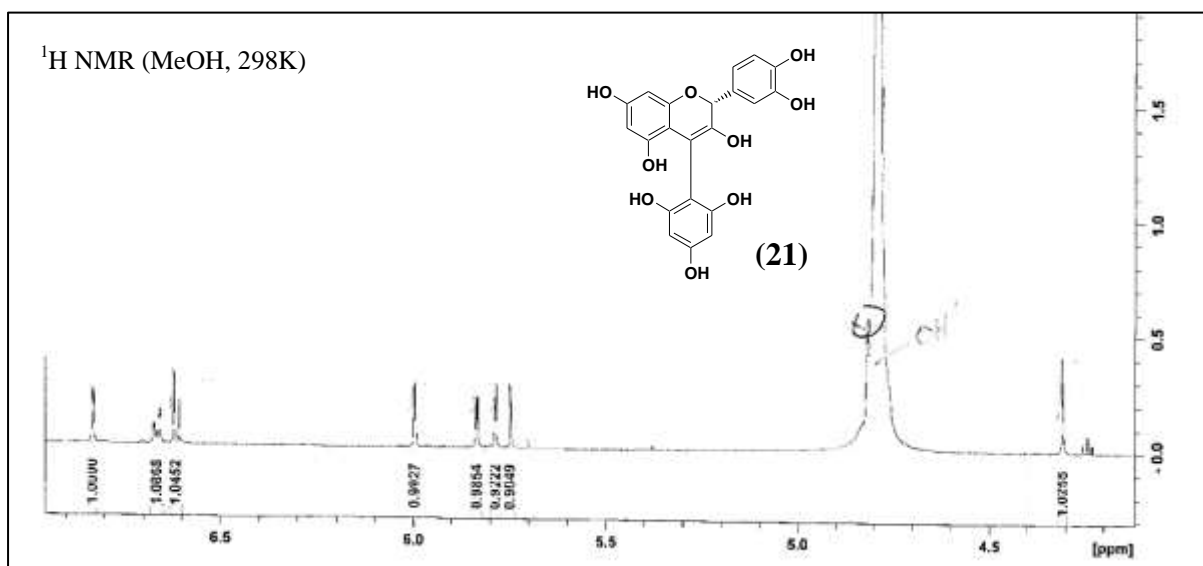



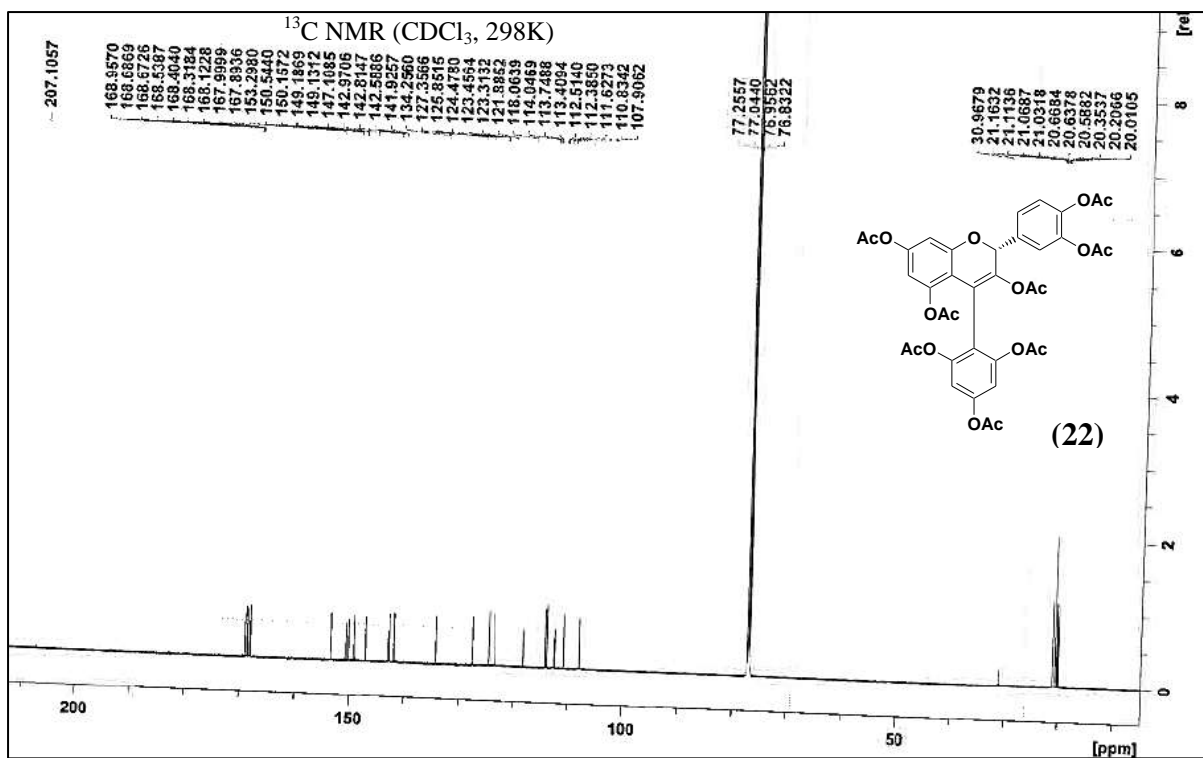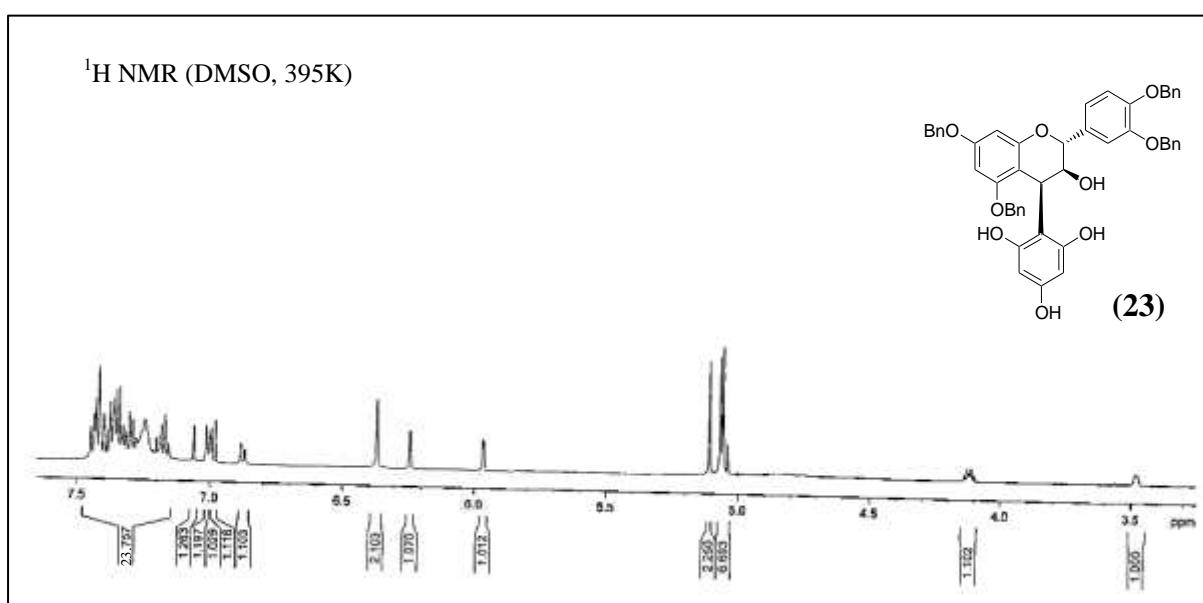



APT  $^{13}\text{C}$  NMR (DMSO, 395K)

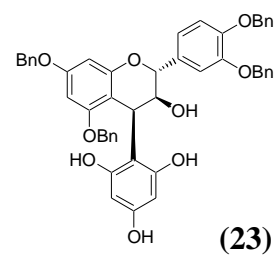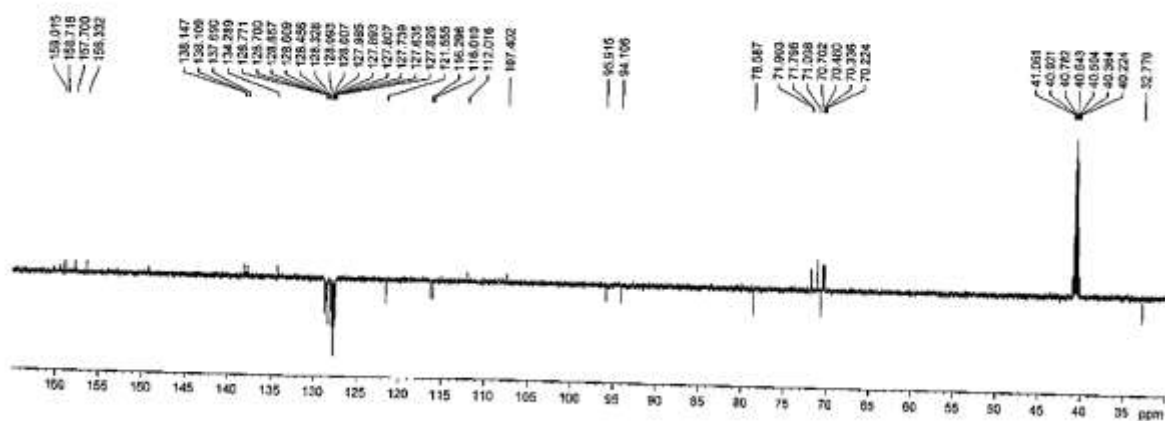

$^1\text{H}$  NMR (MeOH, 295K)

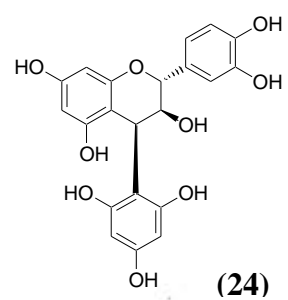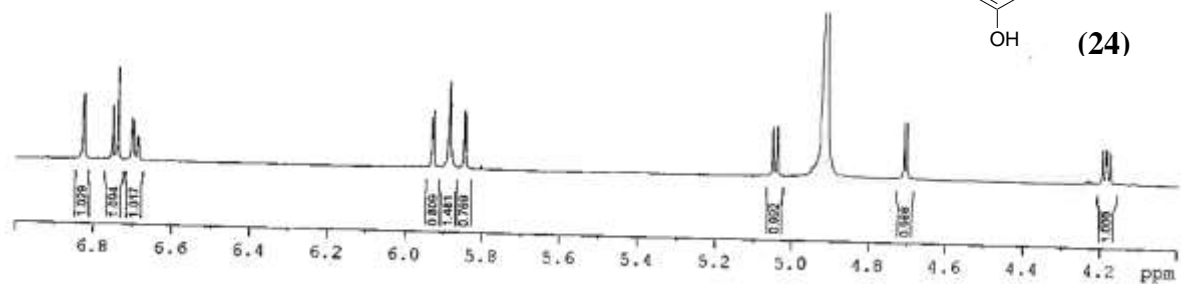

$^{13}\text{C}$  NMR (MeOH, 295K)

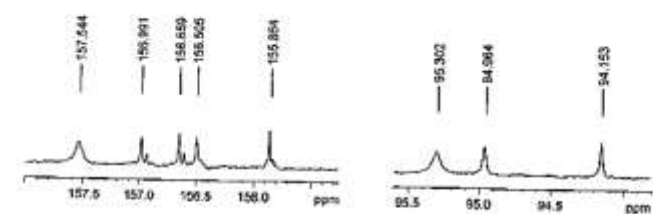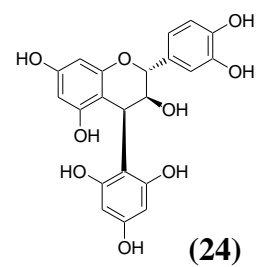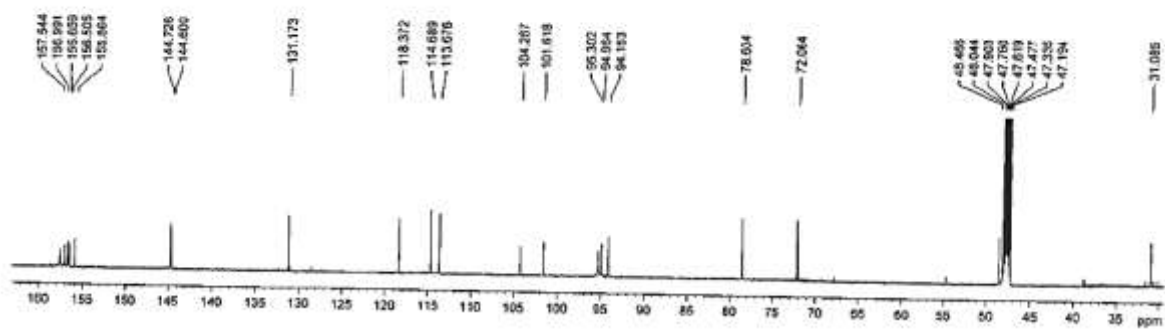

Supplement: f1 [file 3971253.f1.zip]
