# Supplementary material for: Bioactive Phytochemicals: Efficient Synthesis of Optically Active Substituted Flav-3-enes and Flav-3-en-3-o-R Derivatives
Source: Hindawi journal article supplement (doi:10.1155/2017/3971253), 2017-01-01
Supplement: f1 [file 3971253.f1.zip]

Archive with 3 entries (3 files):
- Figure 1-NMR-NOESY_JCHEM_1907926.docx
- Figure 1_JCHEM_1907925.pdf
- mat.3971253.v2.pdf
