# Supplementary figures and images for: Bioactive Phytochemicals: Efficient Synthesis of Optically Active Substituted Flav-3-enes and Flav-3-en-3-o-R Derivatives
Source: Hindawi journal article supplement (doi:10.1155/2017/3971253), 2017-01-01

22

H-6' H-2' H-5'

H-2

Matthew.95.1.2rr  
MA V 94(OAc)8, CDCl3, noesy

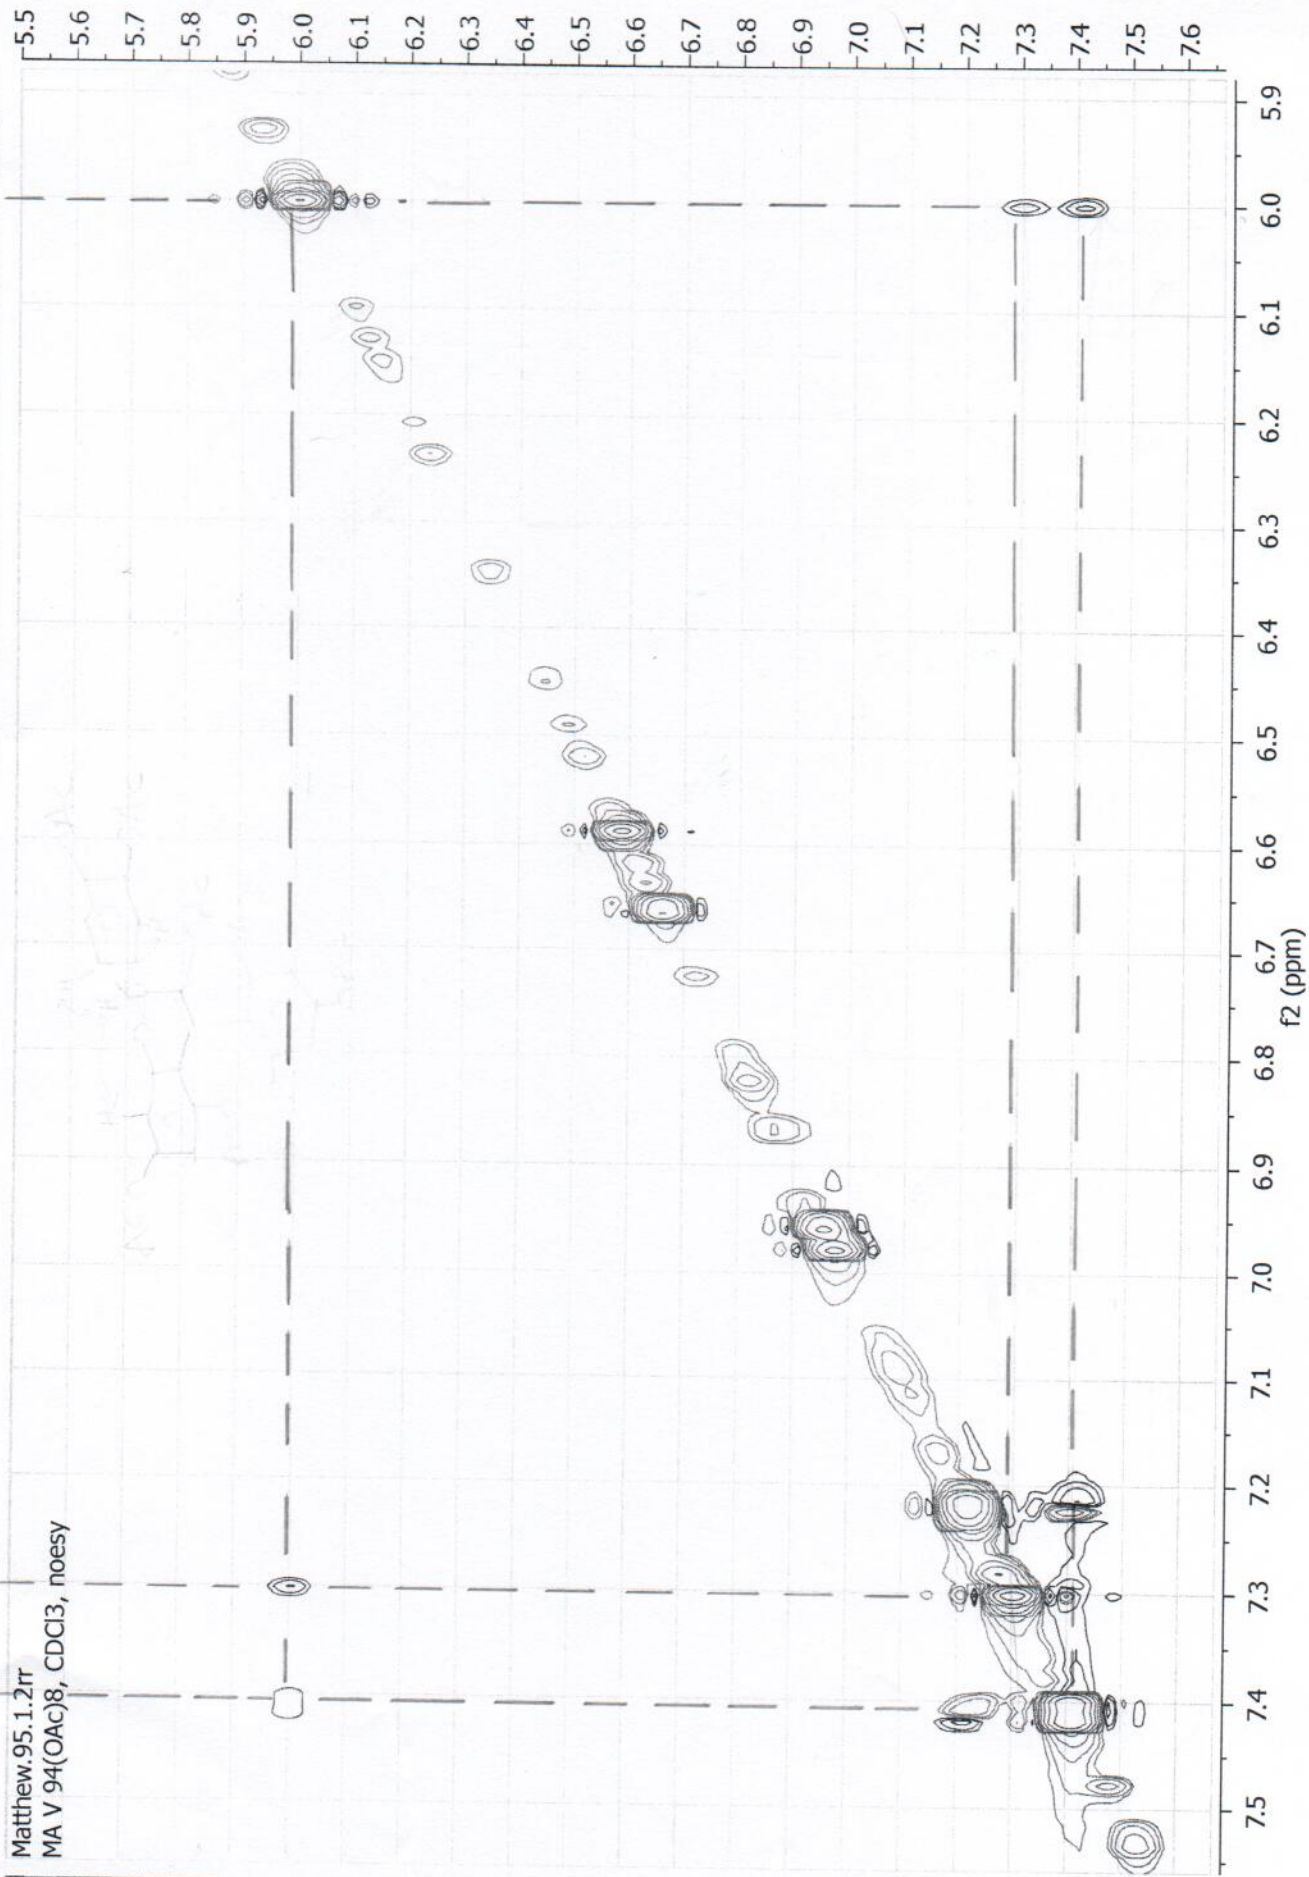

Supplement: f1 [file 3971253.f1.zip]

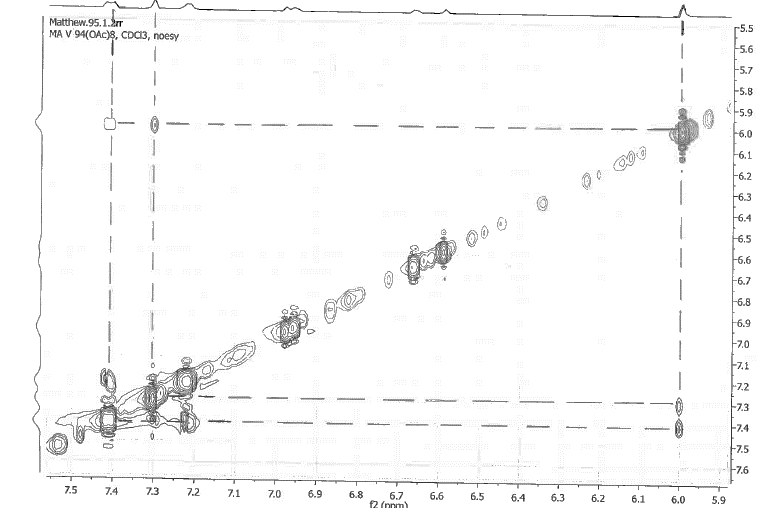


H-2’

H-6’

H-2

Figure 1

Supplement: f1 [file 3971253.f1.zip › Figure 1-NMR-NOESY_JCHEM_1907926.docx]
